# Supplementary material for: Nanoscale battery cathode materials induce DNA damage in bacteria
Source: Royal Society of Chemistry journal article supplement (doi:10.1039/d0sc02987d), 2020-01-01
Supplement: d0sc02987d2.xlsx [file d0sc02987d2.xlsx]

## Sheet: Notes
	0
	All zero values are highlighted, meaning the correcponding ion was not detected in that specific sample and regarded as zero in calculating average and statistics.
	0.000755901
	Yellow highlighted boxes for t-test means p<0.05 comparing exposed and control
	62.084
	Green highlighted boxes for fold changes indicates a value bigger than 10
	There are two putative adducts name marked as "not determined". The structure was not reported before but a reasonable guess based on other adducts or reactions.
	They are not included in main text.
	Criterias for a putative adduct to be included in Table 1 and 2:
		(1) Shows up in any of the exposed samples but none of the control samples ("Only in exposed")
		OR (2) shows a statistically significant difference when comparing exposed and control average with two-tailed t-test.
	Putative adducts included in Table 1 and 2 was marked with "#"
	Criteria for a putative adduct to be included in Figure 3 (more conservative):
		(1) statistically significant difference comparing exposed and control;
		AND (2) appeared in ALL of the three exposed samples (not necessarily all appear in control);
		AND (3) if there are any zero values in control group, the fold change has to be larger than 10.
	Putative adducts included in Figure 3 was marked with "*"

## Sheet: B. subtilis
		[M+H]+	Normalized Peak Area: Control (n=3)	Normalized Peak Area: Exposed (n=3)	Average: Control	Sample Standard Deviation: Control	Average: Exposed	Sample Standard Deviation: Exposed	Fold change	Two tailed p-value (t-Test)	Putative name	Putative formula	Putative Structure	Origin of putative adduct
#	*	229.093	8.63e-05	0.00181	3.506e-05	4.46192e-05	0.00217667	0.000398037	62.084	0.000755901	dIz	C8H12N4O4		Degradation of 8- oxo-dG
		229.093	1.41e-05	0.0026
		229.093	4.78e-06	0.00212
#	*	244.093	0	0.0142	3.38333e-05	2.94802e-05	0.0175667	0.00400791	519.212	0.00162703	5-OH-dC	C9H13N3O5		Oxidative stress
		244.093	4.75e-05	0.0165
		244.093	5.4e-05	0.022
#		252.095	0	0.0018742	0	0	0.00322711	0.00407562	Only in exposed	Only in exposed	3,N2-εdC	C11H13N3O4		Lipid peroxidation
		252.095	0	0.00780715
		252.095	0	0
#	*	260.088	0	0.2771	2.14667e-05	1.86433e-05	0.327033	0.109868	15234.5	0.00671988	5,6-OH-dC	C9H13N3O6		Oxidative stress
		260.088	3.08e-05	0.453
		260.088	3.36e-05	0.251
#	*	262.103	0.000817	2.25	0.000318	0.000432325	1.45667	0.721411	4580.71	0.0249734	5,6-H-5,6-OH-dC	C9H15N3O6		Oxidative stress
		262.103	5.61e-05	1.28
		262.103	8.09e-05	0.84
#	*	266.125	2.34	7	1.22267	0.971278	8.55333	1.43514	6.99564	0.00184652	N6-methyl-dA	C11H15N5O3		Alkyating agent
		266.125	0.58	8.83
		266.125	0.748	9.83
		269.088	0	0.00076	5.1e-05	8.83346e-05	0.000309	0.000399403	6.05882	0.336023	2'-Deoxyxanthosine	C10H12N4O5		Oxidative stress
		269.088	0	0.000167
		269.088	0.000153	0
		282.12	1.08	1.39	0.375667	0.609994	0.796333	0.533247	2.11979	0.419342	O6-methyl-dG	C11H15N5O4		Alkylating agent
		282.12	0.0181	0.641
		282.12	0.0289	0.358
		283.127	0	0.002	1.20333e-05	2.08423e-05	0.00362	0.00330279	300.831	0.131438	unknown
		283.127	0	0.00742
		283.127	3.61e-05	0.00144
#	*	284.099	0.0425	1.35	0.0207467	0.0189705	4.23	2.62549	203.888	0.0499821	8-oxo-dG	C10H13N5O5		Oxidative stress
		284.099	0.0121	4.85
		284.099	0.00764	6.49
#		286.115	0	0.00015381	0	0	0.000425762	0.0003567	Only in exposed	Only in exposed	FAPY-dG	C10H15N5O5
		286.115	0	0.000293847
		286.115	0	0.000829631
		287.11	0	2.2e-05	0.000493333	0.000854478	0.000195467	0.000283818	0.396216	0.597316	Nitroimidazole	C9H14N6O5		Oxidative Stress
		287.11	0	0.000523
		287.11	0.00148	4.14e-05
#	*	296.135	3.24e-05	0.000954	2.94867e-05	2.04264e-05	0.000797333	0.000451851	27.0405	0.0423751	N2-ethyldG	C12H17N5O4		Alkyating agent
		296.135	4.83e-05	0.00115
		296.135	7.76e-06	0.000288
#		297.094	0	0.000252832	0	0	0.000309393	0.000261359	Only in exposed	Only in exposed	Nitro-dA	C10H12N6O5		Oxidative stress
		297.094	0	0.000594401
		297.094	0	8.09454e-05
		298.141	0	0.000123832	0	0	8.69815e-05	7.56203e-05	Only in exposed	Only in exposed	Not determined	C13H19N3O5		Lipid peroxidation
		298.141	0	0.000137113
		298.141	0	0
#		299.124	0	3.09179e-05	0	0	4.08961e-05	4.66917e-05	Only in exposed	Only in exposed	Acr-dT_I	C13H18N2O6		Acrolein
		299.124	0	9.17703e-05
		299.124	0	0
#	*	300.119	0	0.000268	1.55367e-05	2.30335e-05	0.000276333	0.000134693	17.7859	0.0297754	Carboxy-dC	C12H17N3O6		Glycation
		300.119	4.2e-05	0.000415
		300.119	4.61e-06	0.000146
#		306.12	0	0.000956978	0	0	0.00061597	0.000349052	Only in exposed	Only in exposed	M1dA	C13H15N5O4		Malonaldehyde
		306.12	0	0.000631537
		306.12	0	0.000259396
#		308.135	0	0.00236555	0	0	0.00240406	0.000783115	Only in exposed	Only in exposed	Acr-dA_I	C13H17N5O4		Acrolein
		308.135	0	0.00320572
		308.135	0	0.00164091
#		310.115	0	4.69429e-05	0	0	0.000252565	0.000183941	Only in exposed	Only in exposed	N6-hydroxyacetyl-dA	C12H15N5O5		Oxidative stress
		310.115	0	0.000401463
		310.115	0	0.00030929
#		324.13	0	0.000293038	0	0	0.00042449	0.0001683	Only in exposed	Only in exposed	Carboxy-dA	C13H17N5O5		Glycation
		324.13	0	0.000366259
		324.13	0	0.000614173
#	*	324.13	0	0.000111	2.58667e-06	4.48024e-06	0.000133333	2.4173e-05	51.5464	0.000772	Carboxy-dA	C13H17N5O5		Glycation
		324.13	0	0.00013
		324.13	7.76e-06	0.000159
		326.11	0.0935556	0.367473	0.107908	0.0727769	0.315529	0.234967	2.92406	0.217567	O6-CM-dG	C12H15N5O6		Oxidative Stress
		326.11	0.186792	0.520177
		326.11	0.0433766	0.0589363
#		338.146	0	0.000232698	0	0	0.000202036	0.000124217	Only in exposed	Only in exposed	CROdG	C14H19N5O5		Crotonaldehyde
		338.146	0	0.000308051
		338.146	0	6.53593e-05
		340.125	0.000585289	0	0.000241763	0.000305626	0.000159333	0.000142606	0.659048	0.693824	CEG-dG	C13H17N5O6		Glycation
		340.125	0	0.000275
		340.125	0.00014	0.000203
#		370.136	0	0.00266602	0	0	0.00383764	0.00409062	Only in exposed	Only in exposed	CHPG-dG	C14H19N5O7		Glycation
		370.136	0	0.00838623
		370.136	0	0.000460663
		376.125	0.05	0.00207	0.0243133	0.0229714	0.01349	0.0115677	0.55484	0.506457	M2dG	C16H17N5O6		Malonaldehyde
		376.125	0.0172	0.0132
		376.125	0.00574	0.0252
#		382.172	0	0.000174	0	0	0.000904667	0.00141891	Only in exposed	Only in exposed	N2-dimethyldioxane-dG	C16H23N5O6		Lipid Peroxidation
		382.172	0	0
		382.172	0	0.00254
		384.176	0	0.00165924	0.000231025	0.000366715	0.00236261	0.00227505	10.2266	0.184383	Not determined	C16H25N5O6		Lipid Peroxidation
		384.176	0.000653866	0.00490628
		384.176	3.9209e-05	0.000522305
#		386.146	0	2.00807e-05	0	0	6.69355e-06	1.15936e-05	Only in exposed	Only in exposed	M2AA-dA	C18H19N5O5		Malonaldehyde
		386.146	0	0
		386.146	0	0
#		402.14	0	0.00680379	0	0	0.00356534	0.00341365	Only in exposed	Only in exposed	M2AA-dG_I	C18H19N5O6		Malonaldehyde
		402.14	0	0.00389223
		402.14	0	0
		414.141	0.00013	0.00191	0.000987	0.00101645	0.00375333	0.00321876	3.80277	0.228766	M3dA	C19H19N5O6		Malonaldehyde
		414.141	0.00211	0.00747
		414.141	0.000721	0.00188
		424.219	0	0.00909	0.00727333	0.00876151	0.00651633	0.00553875	0.895921	0.905444	HNE-dG	C19H29N5O6		Lipid peroxidation
		424.219	0.017	0.0103
		424.219	0.00482	0.000159
		426.198	0.0144	0.0253	0.00887	0.00663699	0.101193	0.146438	11.4085	0.336639	N2-paraldol-dG	C18H27N5O7		Acrolein
		426.198	0.0107	0.27
		426.198	0.00151	0.00828
		446.203	0	0.000235	5.36667e-05	9.29534e-05	0.000218033	0.000187028	4.06273	0.244533	Carboxynonanone-εdA	C21H27N5O6		Etheno
		446.203	0.000161	0.000396
		446.203	0	2.31e-05
#	*	591.227	4.4092e-06	0.0024905	3.13197e-06	2.72769e-06	0.00295467	0.00183141	943.39	0.0492415	dG-ACR-dG	C23H30N10O9		Acrolein
		591.227	0	0.0049735
		591.227	4.9867e-06	0.0014

## Sheet: S. oneidensis
		[M+H]+	Normalized Peak Area: Control (n=3)	Normalized Peak Area: Exposed (n=3)	Average: Control	Sample Standard Deviation: Control	Average: Exposed	Sample Standard Deviation: Exposed	Fold change	Two tailed p-value (t-Test)	Putative name	Putative formula	Putative Structure	Origin of putative adduct
#	*	229.093	0.0037655	0.0202	0.00137642	0.00207698	0.017	0.00336006	12.3509	0.00237653	dIZ	C8H12N4O4		Degradation 8-oxo-dG
		229.093	0	0.0173
		229.093	0.00036376	0.0135
#		244.093	0	0.00259618	0	0	0.00965695	0.014536	Only in exposed	Only in exposed	5-OH-dC	C9H13N3O5		Oxidative stress
		244.093	0	0.0263747
		244.093	0	0
		246.108	0.000287	0	0.00459567	0.00771271	0.00110333	0.000975209	0.240081	0.479977	5,6-H-5-OH-dC	C9H15N3O5		Oxidative stress
		246.108	0.0135	0.00185
		246.108	0	0.00146
		247.093	0	0.00621	0	0	0.00207	0.00358535	Only in exposed	Only in exposed	5,6-OH-dT	C10H16N2O7		Oxidative stress
		247.093	0	0
		247.093	0	0
#		260.088	0	0.201	0	0	0.195	0.0343948	Only in exposed	Only in exposed	5,6-OH-dC	C9H13N3O6		Oxidative stress
		260.088	0	0.226
		260.088	0	0.158
		266.125	88.9	76.8	174.3	229.257	50.7083	43.8996	0.290925	0.410991	N6-methyl-dA	C11H15N5O3		Alkylating agent
		266.125	434	75.3
		266.125	0	0.0248
#		270.12	0	0.708	0	0	0.572033	0.494183	Only in exposed	Only in exposed	FAPY-A	C10H15N5O4		Oxidative stress
		270.12	0	0.984
		270.12	0	0.0241
		282.12	0.0148	0.0241	0.00493333	0.00854478	0.0191333	0.00515978	3.87838	0.069393	O6-methyl-dG	C11H15N5O4		Alkylating agent
		282.12	0	0.0195
		282.12	0	0.0138
		283.127	0	0.166	0	0	0.111	0.0817985	Only in exposed	Only in exposed	unknown
		283.127	0	0.15
		283.127	0	0.017
#	*	284.099	0.39	4.27	0.245667	0.125165	4.76667	0.430387	19.403	6.30235e-05	8-oxo-dG	C10H13N5O5		Oxidative stress
		284.099	0.167	5.03
		284.099	0.18	5
#	*	286.115	0.481	1.24	0.2184	0.235175	1.27	0.176918	5.81502	0.00346396	FAPY-dG	C10H15N5O5		Oxidative stress
		286.115	0.147	1.46
		286.115	0.0272	1.11
#	*	299.124	0.00266	0.0662	0.000886667	0.00153575	0.0581667	0.0252282	65.6015	0.0171707	Acr-dT_I	C13H18N2O6		Acrolein
		299.124	0	0.0784
		299.124	0	0.0299
#		300.094	0	0.731	0.143	0.129988	0.758667	0.0372335	5.30536	0.00139786	Spiroiminodihydantoin	C10H13N5O6		Oxidative stress
		300.094	0.254	0.801
		300.094	0.175	0.744
		306.12	0.00768	0.00293	0.00256	0.00443405	0.00110333	0.00159331	0.43099	0.620699	M1dA	C13H15N5O4		Malonaldehyde
		306.12	0	0.00038
		306.12	0	0
#	*	308.099	0	0.162	0.00038	0.000658179	0.1281	0.0320473	337.105	0.00231173	2-oxo-1,N2-εdG	C12H13N5O5		Etheno
		308.099	0	0.0983
		308.099	0.00114	0.124
		338.146	0.0240694	0.00127317	0.00858268	0.0134382	0.332933	0.573597	38.7913	0.382946	8-OH-6-methyl-prodG	C14H19N5O5		Crotonaldehyde
		338.146	0.00167861	0.00226034
		338.146	0	0.995266
#	*	340.125	0.000209	0.0665	0.000269333	6.92844e-05	0.0445333	0.0190584	165.347	0.0158285	CEG-dG	C13H17N5O6		Glycation
		340.125	0.000345	0.0324
		340.125	0.000254	0.0347
#	*	382.172	0.001931	0.0195	0.00078154	0.00101672	0.0327333	0.0116989	41.8831	0.0092206	N2-dimethyldioxane-dG	C16H23N5O6		Lipid Peroxidation
		382.172	0.00041362	0.0417
		382.172	0	0.037
		414.141	0	0.00215	5.56667e-06	9.64175e-06	0.00192333	0.00182061	345.509	0.146	M3dA	C19H19N5O6		Malonaldehyde
		414.141	1.67e-05	0.00362
		414.141	0	0
		424.219	0	0.259104	0.00105361	0.0018249	0.0879248	0.148248	83.4513	0.367561	HNE-dG	C19H29N5O6		Lipid peroxidation
		424.219	0.00316082	0.00143866
		424.219	0	0.00323152
		426.198	0.000221	0	0.00263667	0.00422048	0.03742	0.0637253	14.1922	0.398919	N2-paraldol-dG	C18H27N5O7		Acrolein
		426.198	0.000179	0.00126
		426.198	0.00751	0.111
#		436.219	0	0.00794002	0	0	0.0116199	0.00325162	Only in exposed	Only in exposed	DDE-I-dA	C20H29N5O6		Lipid Peroxidation
		436.219	0	0.0141055
		436.219	0	0.0128142
		591.227	0.000337	0.0281	0.000112333	0.000194567	0.00971133	0.0159254	86.451	0.355461	dG-ACR-dG	C23H30N10O9		Acrolein
		591.227	0	0.000405
		591.227	0	0.000629
#	*	310.115	0	0.00462313	3.33154e-05	5.7704e-05	0.0036716	0.000965053	110.207	0.00286008	N6-hydroxyacetyl-dA	C12H15N5O5		Oxidative Stress
		310.115	9.99463e-05	0.00369811
		310.115	0	0.00269357
		310.115	0.0185789	0.0130154	0.00988075	0.00934573	0.0162969	0.0181614	1.64936	0.615284	N6-hydroxyacetyl-dA	C12H15N5O5		Oxidative Stress
		310.115	0.0110634	0.0358753
		310.115	0	0
		326.11	0	0.0756	0.00099	0.00171473	0.0406333	0.0381172	41.0438	0.14631	O6-CM-dG	C12H15N5O6		Oxidative Stress
		326.11	0.00297	0.0463
		326.11	0	0
		326.11	0.0459	0.0115	0.0209494	0.0231926	0.0142033	0.011878	0.677983	0.67707	O6-CM-dG	C12H15N5O6		Oxidative Stress
		326.11	0.0169	0.00391
		326.11	4.82e-05	0.0272

## Sheet: I.S.
S. oneidensis			B. subtilis		15N5-N2-ethyldG
Sample	Peak Area I.S.		Sample	Peak Area I.S.
Control_1	25300000		Control_1	1188346
Control_2	10700000		Control_2	5089476
Control_3	16500000		Control_3	6832566
Exposed_1	8280000		Exposed_1	3647821
Exposed_2	7370000		Exposed_2	2910964
Exposed_3	8000000		Exposed_3	3704840
