# Supplementary material for: Nanoscale battery cathode materials induce DNA damage in bacteria
Source: Royal Society of Chemistry journal article supplement (doi:10.1039/d0sc02987d), 2020-01-01
Supplement: d0sc02987d3.xlsx [file d0sc02987d3.xlsx]

## Sheet: Gene info
S. oneidensis	Gene	Accession Number	Primer Fw	Primer Rv	Protein	NCBI link	Category (General)	B. subtilis	Gene	Accession Number	Primer Fw	Primer Rv	Protein	NCBI link	Category
	mutM	NP_720242.1	GGTGGGCGTTGGGAATATTTA	CTCAGCAACCAGTACCGTTAAG	formamidopyrimidine-DNA glycosylase MutM	https://www.ncbi.nlm.nih.gov/gene/1172305	DNA repair & metabolism		mutM	NP_390786.2	GTA GAG ATC AGA TGG CCG AAT ATC	CCG ATG GAC TGT ATC GTT TCT C	Endonuclease III/thymine glycol DNA glycosylase	https://www.ncbi.nlm.nih.gov/gene/936741	DNA repair & metabolism
	uvrA	NP_719560.1	CGTGAGTCAGATGGTGGATAAA	ATATAACCCTGCGCCGATAAG	excinuclease ABC A subunit UvrA	https://www.ncbi.nlm.nih.gov/gene/?term=uvrA+Shewanella+oneidensis	DNA repair & metabolism		uvrA	NP_391396.1	GAG ACA GGC TCC GAT TTC ATA C	GCA AGC GCC TCT TTC TTT AAC	UvrABC system protein A	https://www.ncbi.nlm.nih.gov/gene/936646	DNA repair & metabolism
	mutS	NP_718984.1	ACAGGAACGACAGGACAATC	TGGTCTCTAACTCGGCAATAAC	DNA mismatch repair protein MutS	https://www.ncbi.nlm.nih.gov/gene/1171106	DNA repair & metabolism
	umuC	AAN52951.1	TTGTGTCTCCCAGTGACAATAC	TGACGCCAGCTTTAGCATAG	Pseudo (translesion error-prone DNA polymerase)?	https://www.ncbi.nlm.nih.gov/gene/1170182	DNA repair & metabolism
	dinB	NP_716739.1	GATCGAGGCTTGTCTGTAAGTC	CTACGGCTTAAACGGGTTGATA	DNA polymerase IV DinB	https://www.ncbi.nlm.nih.gov/gene/1168948	DNA repair & metabolism		yqjH	NP_390268.2	GCA TAG GGA TTG CAC CGA ATA	GGG CAC TTG CCT CTT TCT TA	DNA polymerase IV 1	https://www.ncbi.nlm.nih.gov/gene/938691	DNA repair & metabolism
	recA	NP_718983.1	TGT GTT CAC AGC CCG ATA C	CGC TAC CGA GTC AAC GAT AAT	recombinase A RecA	https://www.ncbi.nlm.nih.gov/gene/1171105	DNA repair & metabolism		recA	NP_389576.2	AGT TCG GCA AAG GTT CCA TTA	CCA ATT CCC AGT GCT GTA TCA	recombinase A	https://www.ncbi.nlm.nih.gov/gene/939497	DNA repair & metabolism
	recB	NP_717749.2	GGGTATGCTCAAGGGCTTTAT	CCTGAATCGTGTCGCCTAAA	exodeoxyribonuclease V beta subunit RecB	https://www.ncbi.nlm.nih.gov/gene/1169889	DNA repair & metabolism		addB	NP_388943.2	GCC GGA AGA CTA CAA GGA TAT G	CAA GGC TCG ACC GGA TAA AT	ATP-dependent helicase/deoxyribonuclease subunit B	https://www.ncbi.nlm.nih.gov/gene/936341	DNA repair & metabolism
	recJ	NP_716581.1	TGATCACCGACCATCATTTACC	CCACACCAGCGATGGATTTA	5'-3' ssDNA exonuclease RecJ	https://www.ncbi.nlm.nih.gov/gene/?term=recJ+shewanella+oneidensis	DNA repair & metabolism		recJ	NP_390640.1	CTG GAA GAT GTC CGC AAG ATA G	CCT TCT TGA AGC TCG CCTTTA	single-stranded-dna-specific exonuclease RecJ	https://www.ncbi.nlm.nih.gov/gene/937538	DNA repair & metabolism
	recF	NP_715652.1	CCGAGCAGGTGACTGAAATA	CGCGGGTAAATGAAACCTTAAC	DNA replication and repair protein RecF	https://www.ncbi.nlm.nih.gov/gene/?term=recF+shewanella+oneidensis	DNA repair & metabolism
	recG	NP_719888.2	CGGCAATCATCAAGCAGAAATC	GCCCTTCAGTCGTTGGATAAA	ATP-dependent DNA helicase RecG	https://www.ncbi.nlm.nih.gov/gene/?term=recG+shewanella+oneidensis	DNA repair & metabolism
	recX	NP_718982.1	TGTATCGAGGCTGCGTTAATAG	CCCTTAACCTCTGTCACTTTAGG	regulatory protein RecX	https://www.ncbi.nlm.nih.gov/gene/?term=recX+shewanella+oneidensis	DNA repair & metabolism
	ruvA	NP_718020.1	GGTGGAAATGCGCGATAAAC	GCATCCTCTTCGGCACTATT	Holliday junction DNA helicase RuvA	https://www.ncbi.nlm.nih.gov/gene/?term=ruvA+shewanella+oneidensis	DNA repair & metabolism		ruvA	NP_390652.1	CTT GAA GAA GCA CTT GAA GCC	GTC TGT TGT CAG CCC AAT TTC	holliday junction ATP-dependent DNA helicase RuvA	https://www.ncbi.nlm.nih.gov/gene/937829	DNA repair & metabolism
	ruvC	NP_718021.1	CCCGATGAGTTTGCCATTGA	GCTGTATTCTGCGACAGGTAAG	crossover junction endodeoxyribonuclease RuvC	https://www.ncbi.nlm.nih.gov/gene/?term=ruvC+shewanella+oneidensis	DNA repair & metabolism		recU	NP_390112.1	CCG CTT TCG ACC AGG TTT AT	AGC TGT TTC TTC CAA CTC ATC T	holliday junction resolvase RecU	https://www.ncbi.nlm.nih.gov/gene/939039	DNA repair & metabolism
	yqgF	NP_718901.1	CGATTTAGTGGTCGTCGGTTTA	CTGTGGTGGTTAGTCTTTCATCT	Holliday junction resolvase YqgF	https://www.ncbi.nlm.nih.gov/gene/1171029	DNA repair & metabolism
	lexA	NP_720119.1	CTCAAGAGCACGTAGAACAGTATTA	CCTTCGAGGATGCCGATATTT	bifunctional transcriptional repressor of SOS-response/self-cleaving protease LexA	https://www.ncbi.nlm.nih.gov/gene/1172187	DNA repair & metabolism		lexA	NP_389668.1	TGC GAT GAC AGA AGA TGA TGA A	CGC CAA TCA CTT TCC CTA GAA	lexa repressor	https://www.ncbi.nlm.nih.gov/gene/939564	DNA repair & metabolism
	polA	NP_720184.1	TGCCGACCATAGCCAATAAC	CAGATGAGGAGGCGCATAATAG	DNA polymerase I PolA	https://www.ncbi.nlm.nih.gov/gene/?term=polA+shewanella+oneidensis	DNA repair & metabolism
	corA	NP_717548.1	GACAGCGAAGAACTCGATGAT	AACGCTGGGTATCGAGTAAAC	divalent cation (Mg2+, Co2+, Ni2+) transporter	https://www.ncbi.nlm.nih.gov/gene/1169702	Metal homeostasis
	hupE	NP_719829.1	TGGTATGGAAATGCCTGAACTC	CCAGCATAACGCCACCTAAA	Nickel uptake transporter HupE	https://www.ncbi.nlm.nih.gov/gene/1171909	Metal homeostasis
	nicT	NP_716370.1	TGGGCTGTTTGGTAAAGTAGAG	TCACCACTATTGAGGGCATTATC	TonB-dependent nickel receptor	https://www.ncbi.nlm.nih.gov/gene/1168592	Metal homeostasis
	hypB	NP_717696.1	CACGATCACAGCCACATACA	GTGGGCTGCTTCTACATCAT	Ni2+-binding GTPase involved in regulation of NiFe hydrogenase expression and maturation	https://www.ncbi.nlm.nih.gov/gene/1169837	Metal homeostasis
									ydbD	NP_388324.1	CTC GCC GCC ATT AAA GAA TTA G	GCT TAC TTC GCC TTCA GAG A	manganese catalase	https://www.ncbi.nlm.nih.gov/gene/938232	Metal homeostasis
									czcD	NP_390542.1	ATT ATG ATG AGT GGC GGA GAT AC	GAG CCG AGC ATA TCG CTT ATT A	cadmium, cobalt and zinc/H	https://www.ncbi.nlm.nih.gov/gene/937630	Metal homeostasis
	gst	NP_720213.1	GCA AAG CAT TCC AGC AAT TT	GAC CTT CTT GCG TTT TGA GC	glutathione S-transferase Gst	https://www.ncbi.nlm.nih.gov/gene/1169380	Oxidative stress
	katB	NP_716697.1	GGC ATT GAT CCT GAT TCT TCT C	TCC AAC GAG GGA AGT TAC CA	catalase HPII KatB	https://www.ncbi.nlm.nih.gov/gene/1168907	Oxidative stress
	sodB	NP_718453.1	GCA ATG TTC GCC CTG ACT AC	CCT GCG AAG TTT TGG TTC AC	Fe/Mn superoxide dismutase SodB	https://www.ncbi.nlm.nih.gov/gene/?term=sodB+shewanella+oneidensis	Oxidative stress
	ahpC	NP_716587.1	CATTCAAAGCCACCGCTTAC	GAAGGTGAAGTCTGCTGGATAG	alkyl hydroperoxide reductase peroxiredoxin component AhpC	https://www.ncbi.nlm.nih.gov/gene/1168803	Oxidative stress		ahpC	NP_391889.1	GACCCATCTCAAACGATCTCTC	GAT ACC GCC TGC ATT GAT TTC	alkyl hydroperoxide reductase subunit C	https://www.ncbi.nlm.nih.gov/gene/938147	Oxidative stress
	trxC	NP_716089.1	ATTCGCTCCATTCCTACCTTAAT	ACGATAACCCTTTAGCCACTG	thioredoxin 2 TrxC	https://www.ncbi.nlm.nih.gov/gene/?term=trxC+shewanella+oneidensis	Oxidative stress
	ccpA	NP_717778.1	GCCTAATAGCCCATTCGATCA	CTGACGCAGCCCTTATCTTTA	diheme cytochrome c5 peroxidase CcpA	https://www.ncbi.nlm.nih.gov/gene/?term=ccpA+shewanella+oneidensis	Oxidative stress
	oxyR	NP_716948.1	CTACCATTGCGCCGTTTCTA	CGTTCCGTCGTATCCTCTTTG	prototype redox-responsive LysR-type transcriptional regulator	https://www.ncbi.nlm.nih.gov/gene/1169149	Oxidative stress
	16S	NR_074798.1	TCA AGT CAT CAT GGC CCT TAC	TAC GAC GAG CTT TGT GAG ATT AG	16S ribosomal RNA	https://www.ncbi.nlm.nih.gov/nuccore/NR_074798.1	Housekeeping
	radA	NP_716849.1	TTC GGC AAT TTT CCT CTC C	ACA CCA CCA TGA CCA AGG AT	ATP-dependent protease	https://www.ncbi.nlm.nih.gov/gene/?term=radA+shewanella+oneidensis	Housekeeping		radA	NP_387968.1	GTA CCG CTG AGC TGA TGA AA	AGT CTC GGA CCT GCA ATA GA	ATP-dependent protease	https://www.ncbi.nlm.nih.gov/gene/936872	Housekeeping
	rpoA	NP_715896.1	TCG CAT CCT ATT GTC GTC TAT G	CTT CTT GTA CGC CTT CCT TAC T	RNA polymerase alpha subunit	https://www.ncbi.nlm.nih.gov/gene/?term=rpoA+shewanella+oneidensis	Housekeeping
	ldhA	NP_716597.1	CGTCAACGTACCCGCTTATT	CGTTGGTAGGCTTTATGGATCT	fermentative lactate dehydrogenase NADH dependent LdhA	https://www.ncbi.nlm.nih.gov/gene/1168813	housekeeping
									ArsR	NP_388414.1	GGC GAT GAC TCG TTG TTT GA	TCC GCA AAT GCT GGC TTA T	ArsR family transcriptional regulator	https://www.ncbi.nlm.nih.gov/gene/?term=AseR+and+Bacillus+subtilis	Housekeeping
									spoVK	NP_389624.2	GTT AAA TCC CGG ACT CCA ATC A	GAC TGA GCT GGT ATT CCC TTT C	stage V sporulation protein K	https://www.ncbi.nlm.nih.gov/gene/940089	Sporulation
									Spo0A	NP_390302.1	GTT AAA TCC CGG ACT CCA ATCA	GAC TGA GCT GGT ATT CCC TTT C	stage 0 sporulation protein A	https://www.ncbi.nlm.nih.gov/gene/938655	Sporulation
